# Supplementary material
Source: Springer Nature journal article supplement (https://www.springermedizin.de/resource/supplementary/12961_2010_142_MOESM1_ESM.pdf/9571528)
Supplement: MOESM1 [file 9571528]

# Policy Engagement Framework

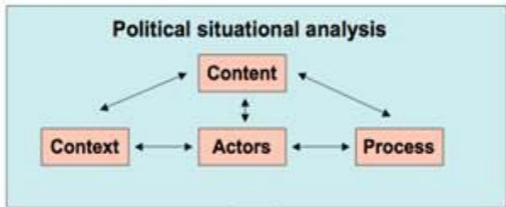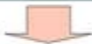

## Strategies to change

**Positions    Power Players    Perspectives**

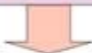

**Successful formulation & implementation of policy**
